# Supplementary material for: Sero-Prevalence and Risk Factors for Leptospirosis in Abattoir Workers in New Zealand
Source: Int J Environ Res Public Health. 2014 Feb 5;11(2):1756–75. doi: 10.3390/ijerph110201756 (PMC3945566; doi:10.3390/ijerph110201756)
Supplement: Supplementary File 1 — Supplementary Information (PDF, 567 KB) [file ijerph-11-01756-s001.pdf]

## Sero-Prevalence and Risk Factors for Leptospirosis in Abattoir Workers in New Zealand

**Table S1.** Frequencies of work-related exposure variables and their unconditional association with sero-prevalence of *Leptospira interrogans* sv. Pomona and/or *Leptospira borgpetersenii* sv. Hardjobovis in sheep plant workers (n = 325) blood sampled and interviewed from January–April 2010.

| Variable                                    | Category                              | % Workers (n) | Sero-prevalence % | Crude OR | 95% CI   | p-value             |
|---------------------------------------------|---------------------------------------|---------------|-------------------|----------|----------|---------------------|
| Work position                               | Boning, chillers, office              | 42.5 (138)    | 2.2               | Ref.     |          | <0.001 <sup>2</sup> |
|                                             | Offal, pet food                       | 13.5 (44)     | 11.4              | 5.8      | 1.3–25.2 | 0.02                |
|                                             | Gut & kidney removal, meat inspection | 17.5 (57)     | 17.5              | 9.6      | 2.5–36.3 | 0.001               |
|                                             | Yards, stunning, pelting              | 26.5 (86)     | 27.9              | 17.4     | 5.0–60.0 | <0.001              |
| Wear gloves on both hands                   | never                                 | 29.2 (95)     | 13.7              | Ref.     |          | 0.99 <sup>2</sup>   |
|                                             | sometimes                             | 12 (39)       | 12.8              | 0.9      | 0.3–2.8  | 0.894               |
|                                             | often                                 | 2.8 (9)       | 11.1              | 0.8      | 0.1–6.8  | 0.829               |
|                                             | always                                | 56 (182)      | 12.6              | 0.9      | 0.4–1.9  | 0.806               |
| Wear safety glasses                         | never                                 | 37.9 (123)    | 7.3               | Ref.     |          | 0.11 <sup>2</sup>   |
|                                             | sometimes                             | 12.9 (42)     | 16.7              | 2.5      | 0.9–7.3  | 0.085               |
|                                             | often                                 | 6.2 (20)      | 15.0              | 2.2      | 0.5–9.1  | 0.261               |
|                                             | always                                | 43.1 (140)    | 16.4              | 2.5      | 1.1–5.6  | 0.028               |
| Wear a facemask                             | never or sometimes                    | 93.2 (303)    | 11.9              | Ref.     |          |                     |
|                                             | often or always                       | 6.8 (22)      | 27.3              | 2.8      | 1.0–7.6  | 0.04                |
| Wear a balaclava                            | never or sometimes                    | 69.5 (226)    | 11.1              | Ref.     |          |                     |
|                                             | often or always                       | 30.5 (99)     | 17.2              | 1.7      | 0.9–3.2  | 0.1                 |
| Months worked at current plant              | ≤60                                   | 34.2 (111)    | 6.3               | Ref.     |          | 0.04 <sup>2</sup>   |
|                                             | >60 - 108                             | 20.9 (68)     | 13.2              | 2.3      | 0.8–6.4  | 0.122               |
|                                             | > 108-192                             | 20.9 (68)     | 16.2              | 2.9      | 1.0–7.8  | 0.039               |
|                                             | >192                                  | 24 (78)       | 19.2              | 3.5      | 1.4–9.1  | 0.009               |
| Months worked in meat industry <sup>1</sup> | ≤60                                   | 28.3 (73)     | 6.8               | Ref.     |          | 0.25 <sup>2</sup>   |
|                                             | >60 - 123                             | 22.9 (59)     | 16.9              | 2.8      | 0.9–8.6  | 0.078               |
|                                             | > 123-288                             | 27.5 (71)     | 15.5              | 2.5      | 0.8–7.6  | 0.108               |
|                                             | >288                                  | 21.3 (55)     | 14.5              | 2.3      | 0.7–7.5  | 0.162               |
| Smoking at work                             | No                                    | 71.7 (231)    | 13.9              | Ref.     |          |                     |
|                                             | Yes                                   | 28.3 (91)     | 11.0              | 0.8      | 0.4–1.6  | 0.493               |
| Abattoir                                    | Sheep plant 1                         | 32 (104)      | 11.5              | Ref.     |          | 0.04 <sup>2</sup>   |
|                                             | Sheep plant 2                         | 29.9 (97)     | 11.3              | 1.0      | 0.4–2.3  | 0.965               |
|                                             | Sheep plant 3                         | 9.9 (32)      | 31.3              | 3.5      | 1.3–9.1  | 0.011               |
|                                             | Sheep plant 4                         | 28.3 (92)     | 9.8               | 0.8      | 0.3–2.1  | 0.692               |

Notes: <sup>1</sup> n = 258; <sup>2</sup> p-value of the LRT for all exposure categories combined.

**Table S2.** Frequencies of work related exposure variables and their unconditional association with sero-prevalence of *Leptospira interrogans* sv. Pomona (Pom) and/or *Leptospira borgpetersenii* sv. Hardjovobis (Har) in deer plant workers (n = 57) blood sampled and interviewed in November 2009.

| Variable                                    | Category                                                        | % Workers (n) | Sero-Prevalence % | Crude OR         | 95% CI    | p-value            |
|---------------------------------------------|-----------------------------------------------------------------|---------------|-------------------|------------------|-----------|--------------------|
| Work position                               | Boning, chillers, office                                        | 59.7 (34)     | 2.9               | Ref.             |           |                    |
|                                             | Offal, pet food, gut & kidney removal, yards, stunning, pelting | 40.4 (23)     | 39.1              | 21.2             | 2.4–183.7 | 0.006              |
| Wear gloves on both hands                   | never                                                           | 73.7 (42)     | 21.9              |                  |           | 0.65 <sup>2</sup>  |
|                                             | sometimes                                                       | 5.3 (3)       | 10.0              | 0.4              | 0.0–3.7   | 0.416              |
|                                             | often                                                           |               | 0.0               |                  |           |                    |
|                                             | always                                                          | 21.1 (12)     | 15.4              | 0.6              | 0.1–3.6   | 0.624              |
| Wear safety glasses                         | never                                                           | 73.7 (42)     | 7.1               |                  |           | 0.004 <sup>2</sup> |
|                                             | sometimes                                                       | 5.3 (3)       | 33.3              | 6.5              | 0.4–94.1  | 0.17               |
|                                             | often                                                           |               | 0.0               |                  |           |                    |
|                                             | always                                                          | 21.1 (12)     | 50.0              | 13.0             | 2.5–66.4  | 0.002              |
| Wear a facemask                             | never or sometimes                                              | 96.5 (55)     | 16.4              | Ref.             |           |                    |
|                                             | often or always                                                 | 3.5 (2)       | 50.0              | 5.1              | 0.3–89.5  | 0.264              |
| Wear a balaclava                            | never or sometimes                                              | 91.2 (52)     | 17.3              | Ref.             |           |                    |
|                                             | often or always                                                 | 8.8 (5)       | 20.0              | 1.2 <sup>3</sup> | 0.1–12.0  | 0.88               |
| Months worked at current plant              | ≤60 months                                                      | 50 (13)       | 15.4              |                  |           |                    |
|                                             | >60–108 months                                                  | 15.4 (4)      | 0.0               |                  |           |                    |
|                                             | >108–192 months                                                 | 34.6 (9)      | 33.3              |                  |           |                    |
|                                             | >192 months                                                     |               | 0.0               |                  |           |                    |
| Months worked in meat industry <sup>1</sup> | ≤60 months                                                      | 21.1 (12)     | 0.0               | <sup>3</sup>     |           |                    |
|                                             | >60–123 months                                                  | 26.3 (15)     | 33.3              |                  |           |                    |
|                                             | >123–288 months                                                 | 24.6 (14)     | 14.3              |                  |           |                    |
|                                             | >288 months                                                     | 28.1 (16)     | 18.8              |                  |           |                    |
| Smoking at work                             | No                                                              | 58.9 (33)     | 18.2              | Ref.             |           |                    |
|                                             | Yes                                                             | 41.1 (23)     | 17.4              | 0.9              | 0.2–3.8   | 0.939              |
| Abattoir                                    | Deer plant1                                                     | 36.8 (21)     | 19.0              | Ref.             |           | 0.9 <sup>2</sup>   |
|                                             | Deer plant2                                                     | 63.2 (36)     | 16.7              | 0.8              | 0.2–3.4   | 0.82               |

Notes: <sup>1</sup> n = 258; <sup>2</sup> p-value of the LRT for all exposure categories combined; <sup>3</sup> model did not run, due to data sparsity issues.

**Table S3.** Frequencies of work related exposure variables and their unconditional association with sero-prevalence of *Leptospira interrogans* sv. Pomona (Pom) and/or *Leptospira borgpetersenii* sv. Hardjobovis (Har) in beef plant workers (n = 185) blood sampled and interviewed from January–April 2010.

| Variable                                    | Category                                                        | % Workers<br>(n) | Sero-Prevalence<br>% | Crude<br>OR       | 95%<br>CI | p-value           |
|---------------------------------------------|-----------------------------------------------------------------|------------------|----------------------|-------------------|-----------|-------------------|
| Work position                               | Boning, chillers, office                                        | 44.9 (83)        | 3.6                  | Ref.              |           | 0.77 <sup>3</sup> |
|                                             | Maintenance                                                     | 5.4 (10)         | 10                   | 3.0               | 0.3–31.6  | 0.368             |
|                                             | Offal, pet food                                                 | 11.4 (21)        | 9.5                  | 2.8               | 0.4–18.0  | 0.276             |
|                                             | Yards, stunning, pelting, gut & kidney removal, meat inspection | 38.4 (71)        | 5.6                  | 1.6               | 0.3–7.4   | 0.552             |
| Wear gloves on both hands <sup>1</sup>      | never                                                           | 20.1 (37)        | 2.7                  | Ref. <sup>4</sup> |           | 0.25 <sup>3</sup> |
|                                             | sometimes                                                       | 13 (24)          | 0.0                  | <sup>4</sup>      |           |                   |
|                                             | often                                                           | 2.7 (5)          | 0.0                  | <sup>4</sup>      |           |                   |
|                                             | always                                                          | 64.1 (118)       | 7.6                  | 2.8               | 0.4–24.3  | 0.309             |
| Wear safety glasses                         | never                                                           | 66 (122)         | 5.7                  | Ref. <sup>4</sup> |           | 0.47 <sup>3</sup> |
|                                             | sometimes                                                       | 4.3 (8)          | 0.0                  | <sup>4</sup>      |           |                   |
|                                             | often                                                           | 2.7 (5)          | 20.0                 | 4.1               | 0.4–41.8  | 0.233             |
|                                             | always                                                          | 27 (50)          | 4.0                  | 0.7               | 0.1–3.4   | 0.644             |
| Wear a facemask                             | never or sometimes                                              | 97.8 (181)       | 5.0                  | Ref.              |           |                   |
|                                             | often or always                                                 | 2.2 (4)          | 25.0                 | 6.4               | 0.6–67.5  | 0.124             |
| Wear a balaclava <sup>1</sup>               | never or sometimes                                              | 92.4 (171)       | 5.8                  | <sup>4</sup>      |           |                   |
|                                             | often or always                                                 | 7.6 (14)         | 0.0                  |                   |           |                   |
| Months worked at current plant              | <61 months                                                      | 27 (50)          | 2.0                  | Ref. <sup>4</sup> |           | 0.12 <sup>3</sup> |
|                                             | 61–108 months                                                   | 24.3 (45)        | 0.0                  | <sup>4</sup>      |           |                   |
|                                             | 109–192 months                                                  | 21.6 (40)        | 12.5                 | 7.0               |           | 0.082             |
|                                             | >192 months                                                     | 27 (50)          | 8.0                  | 4.3               | 0.5–39.5  | 0.202             |
| Months worked in meat industry <sup>2</sup> | <61 months                                                      | 22.7 (42)        | 2.4                  | Ref. <sup>4</sup> |           | 0.19 <sup>3</sup> |
|                                             | 61–123 months                                                   | 26.5 (49)        | 0.0                  | <sup>4</sup>      |           |                   |
|                                             | 124–288 months                                                  | 22.2 (41)        | 12.2                 | 5.7               | 0.6–51.0  | 0.12              |
|                                             | >288 months                                                     | 28.7 (53)        | 7.5                  | 3.3               | 0.4–31.1  | 0.288             |
| Smoking <sup>2</sup>                        | No                                                              | 73.4 (127)       | 7.1                  | Ref.              |           |                   |
|                                             | Yes                                                             | 26.6 (46)        | 2.2                  | 0.3               | 0.0–2.4   | 0.248             |
| Abattoir                                    | Beef plant1                                                     | 39.5 (73)        | 5.5                  | Ref.              |           |                   |
|                                             | Beef plant2                                                     | 60.5 (112)       | 5.4                  | 1.0               | 0.3–3.6   | 0.971             |

Notes: <sup>1</sup> n = 184; <sup>2</sup> n = 173; <sup>3</sup> p-value of the LRT for all exposure categories combined; <sup>4</sup> model did not converge, category dropped, due to sparse data.

**Table S4.** Frequencies of clinical, demographic and non-work related exposure variables and their unconditional association with sero-prevalence of *Leptospira interrogans* sv. Pomona and/or *Leptospira borgpetersenii* sv. Hardjobovis in sheep plant workers (n = 325) blood sampled and interviewed from January–April 2010.

| Variable                            | Category | % Workers (n) | Sero-Prevalence % | Crude OR | 95% CI   | p-value           |
|-------------------------------------|----------|---------------|-------------------|----------|----------|-------------------|
| Probable Leptospirosis <sup>1</sup> | No       | 87.7 (285)    | 8.1               | Ref.     |          |                   |
|                                     | Yes      | 12.3 (40)     | 47.5              | 10.3     | 4.8–21.9 | <0.001            |
| Had flu-like-illness                | No       | 63.4 (206)    | 13.1              | Ref.     |          |                   |
|                                     | Yes      | 36.6 (119)    | 12.6              | 0.9      | 0.5–1.9  | 0.88              |
| Gender                              | Female   | 29.5 (96)     | 3.1               | Ref.     |          |                   |
|                                     | Male     | 70.5 (229)    | 17.0              | 6.4      | 1.9–21.1 | 0.003             |
| Age                                 | ≤ 37     | 25.5 (83)     | 14.5              | Ref.     |          | 0.5 <sup>5</sup>  |
|                                     | >37, ≤48 | 28 (91)       | 8.8               | 0.6      | 0.2–1.5  | 0.246             |
|                                     | >48, ≤55 | 22.2 (72)     | 12.5              | 0.8      | 0.3–2.1  | 0.723             |
|                                     | >55      | 24.3 (79)     | 16.5              | 1.2      | 0.5–2.7  | 0.725             |
| Hunting any Species <sup>2</sup>    | No       | 83.1 (270)    | 13.3              | Ref.     |          |                   |
|                                     | Yes      | 16.9 (55)     | 10.9              | 0.8      | 0.3–2.0  | 0.626             |
| Hunting pigs, deer or feral goats   | No       | 85.9 (279)    | 13.3              | Ref.     |          |                   |
|                                     | Yes      | 14.2 (46)     | 10.9              | 0.8      | 0.3–2.1  | 0.655             |
| Farming <sup>3</sup>                | No       | 84.6 (275)    | 13.8              | Ref.     |          |                   |
|                                     | Yes      | 15.4 (50)     | 8.0               | 0.5      | 0.2–1.6  | 0.26              |
| Ethnicity                           | NZ       | 33.9 (110)    | 8.2               | Ref.     |          | 0.19 <sup>5</sup> |
|                                     | European |               |                   |          |          |                   |
|                                     | NZ Maori | 57.5 (187)    | 15.5              | 2.0      | 0.9–4.5  | 0.072             |
|                                     | Other    | 8.6 (28)      | 14.3              | 1.9      | 0.5–6.6  | 0.33              |
| Slaughtering at home <sup>4</sup>   | No       | 69.5 (226)    | 10.6              | Ref.     |          |                   |
|                                     | Yes      | 30.5 (99)     | 18.2              | 1.9      | 1.0–3.6  | 0.06              |

Notes: <sup>1</sup> was not included in the multivariable model, as it was an intermediate variable between exposure and antibody level; <sup>2</sup> pigs, deer, goats, birds, rodents, possums; <sup>3</sup> pigs, goats, sheep, beef cattle, alpaca or deer;

<sup>4</sup> sheep, goats, pigs, beef or deer; <sup>5</sup> p-value of the LRT for all exposure categories combined.

**Table S5.** Frequencies of clinical, demographic and non-work related exposure variables and their unconditional association with sero-prevalence of *Leptospira interrogans* sv. Pomona (Pom) and/or *Leptospira borgpetersenii* sv. Hardjobovis (Har) in deer plant workers (n = 57) blood sampled and interviewed in November 2009.

| Variable                            | Category | % Workers (n) | Sero-Prevalence % | Crude OR         | 95% CI    | p-value           |
|-------------------------------------|----------|---------------|-------------------|------------------|-----------|-------------------|
| Probable leptospirosis <sup>1</sup> | No       | 91.2 (52)     | 11.5              | Ref.             |           |                   |
|                                     | Yes      | 8.8 (5)       | 80                | 30.7             | 2.9–321.8 | 0.004             |
| Had flu-like-illness                | No       | 38.6 (22)     | 22.7              | Ref.             |           |                   |
|                                     | Yes      | 61.4 (35)     | 14.3              | 0.7              | 0.1–2.2   | 0.42              |
| Gender                              | Female   | 15.8 (9)      | 0.0               | Ref.             |           |                   |
|                                     | Male     | 84.2 (48)     | 20.8              | <sup>6</sup>     |           |                   |
| Age                                 | <32      | 26.3 (15)     | 20.0              | Ref.             |           | 0.93 <sup>5</sup> |
|                                     | 32–42    | 24.6 (14)     | 14.3              | 0.7              | 0.1–4.7   | 0.685             |
|                                     | 43–47    | 24.6 (14)     | 21.4              | 1.1              | 0.2–6.6   | 0.924             |
|                                     | >47      | 24.6 (14)     | 14.3              | 0.7              | 0.9–4.7   | 0.685             |
| Hunting any species <sup>2</sup>    | No       | 63.2 (36)     | 13.9              | Ref.             |           |                   |
|                                     | Yes      | 36.8 (21)     | 23.8              | 1.9              | 0.5–7.7   | 0.347             |
| Hunting pigs, deer or feral goats   | No       | 70.2 (40)     | 12.5              | Ref.             |           |                   |
|                                     | Yes      | 29.8 (17)     | 29.4              | 2.9              | 0.7–11.8  | 0.135             |
| Farming <sup>3</sup>                | No       | 80.7 (46)     | 17.4              | Ref.             |           |                   |
|                                     | Yes      | 19.3 (11)     | 18.2              | 1.1              | 0.2–5.8   | 0.951             |
| Ethnicity                           | NZ       | 87.7 (50)     | 18.0              | Ref.             |           |                   |
|                                     | European |               |                   |                  |           |                   |
|                                     | NZ Maori | 7 (4)         | 25.0              | 0.8 <sup>7</sup> | 0.1–7.1   | 0.809             |
|                                     | Other    | 5.3 (3)       | 0.0               |                  |           |                   |
| Slaughtering at home <sup>4</sup>   | No       | 64.9 (37)     | 18.9              | Ref.             |           |                   |
|                                     | Yes      | 35.1 (20)     | 15.0              | 0.8              | 0.2–3.3   | 0.711             |

Notes: <sup>1</sup>Not included in the multivariable model, as it was an intermediate variable between exposure and antibody level, hence not a confounder; <sup>2</sup>pigs, deer, goats, birds, rodents, possums; <sup>3</sup>pigs, goats, sheep, beef cattle, alpaca or deer; <sup>4</sup>sheep, goats, pigs, beef & or deer; <sup>5</sup>p-value of the LRT for all exposure categories combined; <sup>6</sup>The category group “female” had no *Leptospira* sero-positive observations; <sup>7</sup>ethnicity: category 2 and 3 were collapsed into category 2.

**Table S6.** Frequencies of clinical, demographic and non-work related exposure variables and their unconditional association with sero-prevalence of *Leptospira interrogans* sv. Pomona and/or *Leptospira borgpetersenii* sv. Hardjobovis in beef plant workers (n = 185) blood sampled and interviewed from January–April 2010.

| Variable                            | Category | % Workers (n) | Sero-Prevalence % | Crude OR       | 95% CI     | p-value           |
|-------------------------------------|----------|---------------|-------------------|----------------|------------|-------------------|
| Probable leptospirosis <sup>1</sup> | No       | 91.9 (170)    | 1.8               | Ref.           |            |                   |
|                                     | Yes      | 8.1 (15)      | 46.7              | 48.7           | 10.6–224.3 | <0.001            |
| Had flu-like-illness                | No       | 49.7 (92)     | 7.6               | Ref.           |            |                   |
|                                     | Yes      | 50.3 (93)     | 3.2               | 0.4            | 0.1–1.6    | 0.2               |
| Gender                              | Female   | 24.3 (45)     | 0.0               | <sup>7,8</sup> |            | 0.06 <sup>6</sup> |
|                                     | Male     | 75.7 (140)    | 7.1               |                |            |                   |
| Age                                 | ≤34      | 25.4 (47)     | 0.0               | <sup>7,8</sup> |            | 0.1 <sup>6</sup>  |
|                                     | >34, ≤48 | 26.5 (49)     | 4.1               |                |            |                   |
|                                     | >48, ≤56 | 24.3 (45)     | 6.7               |                |            |                   |
|                                     | >56      | 23.8 (44)     | 11.4              |                |            |                   |
| Hunting all species <sup>2</sup>    | No       | 86 (159)      | 5.0               | Ref.           |            |                   |
|                                     | Yes      | 14.1 (26)     | 7.7               | 1.6            | 0.3–7.9    | 0.581             |
| Hunting pigs, deer or feral goats   | No       | 88.1 (163)    | 5.5               | Ref.           |            |                   |
|                                     | Yes      | 11.9 (22)     | 4.5               | 0.8            | 0.1–6.8    | 0.85              |
| Farming <sup>3</sup>                | No       | 84.3 (156)    | 5.8               | Ref.           |            |                   |
|                                     | Yes      | 15.7 (29)     | 3.4               | 0.6            | 0.1–4.8    | 0.616             |
| Ethnicity                           | NZ       | 41.1 (76)     | 5.3               | Ref.           |            | 0.07 <sup>6</sup> |
|                                     | European |               |                   |                |            |                   |
|                                     | NZ Maori | 44.9 (83)     | 2.4               | 0.4            | 0.1–2.5    | 0.357             |
|                                     | Other    | 14.1 (26)     | 15.4              | 3.3            | 0.8–14.2   | 0.113             |
| Slaughtering at home <sup>4</sup>   | No       | 72.4 (134)    | 6.0               | Ref.           |            |                   |
|                                     | Yes      | 27.6 (51)     | 3.9               | 0.6            | 0.1–3.1    | 0.585             |

Notes: <sup>1</sup> was not included in the multivariable model, as it was an intermediate variable between exposure and antibody level; <sup>2</sup> pigs, deer, goats, birds, rodents, possums; <sup>3</sup> pigs, goats, sheep, beef cattle, alpaca & or deer; <sup>4</sup> sheep, goats, pigs, beef & or deer, <sup>5</sup> is an intermediate variable; <sup>6</sup> p-value of the LRT for all exposure categories combined; <sup>7</sup> the category groups “female” and “age group 1” had no *Leptospira* sero-positive observations; <sup>8</sup> model did not run, due to data sparsity issues.

## Study on Leptospirosis among Abattoir Workers

### Participant Questionnaire

The research team appreciates your involvement in this study of leptospirosis and is committed to privacy of all personal information.

The information from this questionnaire will help us to assess the risk of contracting leptospirosis in meat plants and to develop control strategies.

Personal information included in the questionnaire will be treated in confidence and will not be published or disclosed to any third parties (for example your employer) by the research team in a manner that would allow identification of participants.

Date of interview: \_\_\_\_/\_\_\_\_/2011 Interviewer's name: \_\_\_\_\_

Meat plant: \_\_\_\_\_

### Participant Identification

|                                                     |                                 |                  |                                     |
|-----------------------------------------------------|---------------------------------|------------------|-------------------------------------|
| Name & Sir name                                     |                                 |                  |                                     |
| Did you fill in a consent and confidentiality form? | Yes                             | No               | Please get both forms filled in now |
| Postal address                                      |                                 |                  |                                     |
| Contact phone number                                |                                 |                  |                                     |
| Type of location                                    | Rural                           | Lifestyle*       | Urban                               |
| Date of Birth                                       | (day/month/year) ____/____/____ |                  |                                     |
| Gender                                              | Male                            | Female           |                                     |
| With which ethnic affiliation do you identify with? | NZ-Maori                        | Pacific Islander | NZ-European                         |
|                                                     | Asian                           | Other            | _____                               |

Note: \* e.g., living on the outskirts of town on a property with > 1 acre of land.

**Exposure at Work***Current Info: Your Work at the Meat Plant*

|                                                                                                                                |                                                                                                                                                                                                                                                                                                                                         |
|--------------------------------------------------------------------------------------------------------------------------------|-----------------------------------------------------------------------------------------------------------------------------------------------------------------------------------------------------------------------------------------------------------------------------------------------------------------------------------------|
| For how long have you been working for this meat plant (years)?                                                                | _____ years                                                                                                                                                                                                                                                                                                                             |
| How many months worked from ____2010 - ____2011?<br>(Have you had a longer break than 6 weeks)                                 | _____ months                                                                                                                                                                                                                                                                                                                            |
| Did this plant have a seasonal break?                                                                                          | Yes _____ No _____                                                                                                                                                                                                                                                                                                                      |
| If yes, date work started this season                                                                                          | (day/month/year) ____/____/____                                                                                                                                                                                                                                                                                                         |
| Which animal species are you exposed to at work<br>(only ask if multispecies plant)?                                           |                                                                                                                                                                                                                                                                                                                                         |
| Worked for another meat plant from ____2010 to ____2011? If yes, where and species<br>slaughtered/processed?                   |                                                                                                                                                                                                                                                                                                                                         |
| Do you believe Leptospirosis presents a serious health risk at your work?                                                      | No _____ Yes _____ Maybe _____ Don't know _____                                                                                                                                                                                                                                                                                         |
| Job description                                                                                                                |                                                                                                                                                                                                                                                                                                                                         |
| In your daily routine, how often do you get in contact with urine, kidneys, urine bladder or with urine contaminated surfaces? |                                                                                                                                                                                                                                                                                                                                         |
| Do you recall having animal urine land on your eyes or mouth while in your current job?                                        | No _____ Yes _____ Don't know _____                                                                                                                                                                                                                                                                                                     |
| Work position/<br>Job title                                                                                                    | What proportion of your time do you spend in the following locations in the plant?<br>Refer to drawing of plant and put a cross where you usually work. If you usually change your work position, indicate all positions and estimate the percentage of time you spend at each position. Interviewer: assign a number to each position. |

Work position at the meat plant (Sheep)

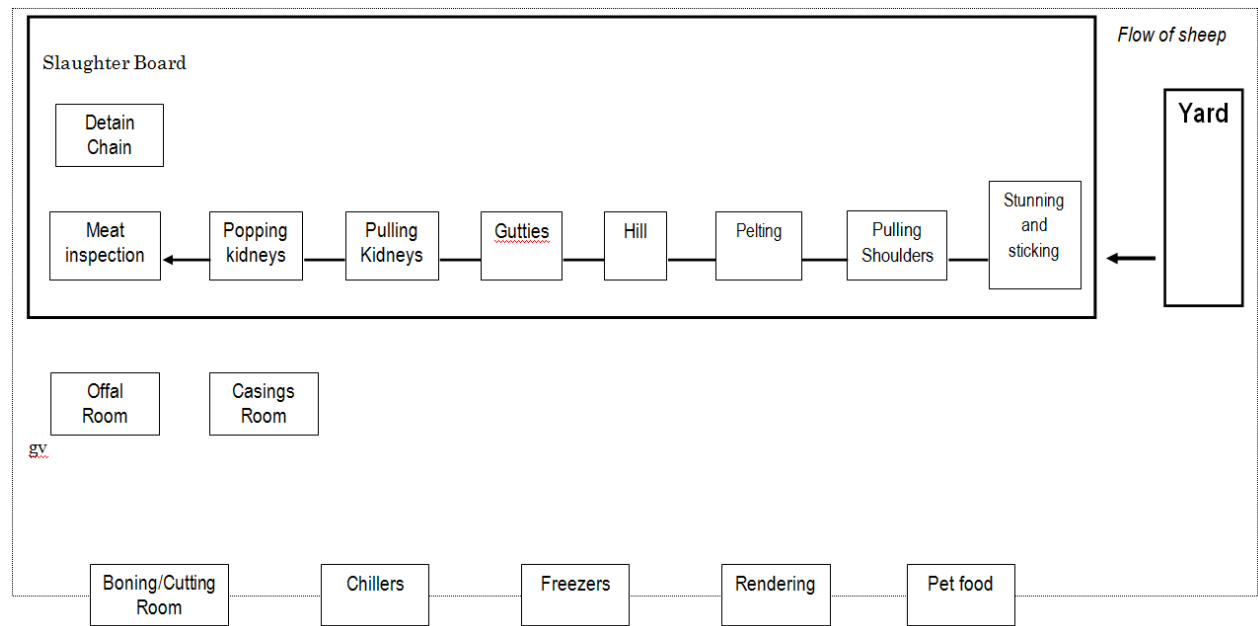

Work position at the meat plant (Beef)

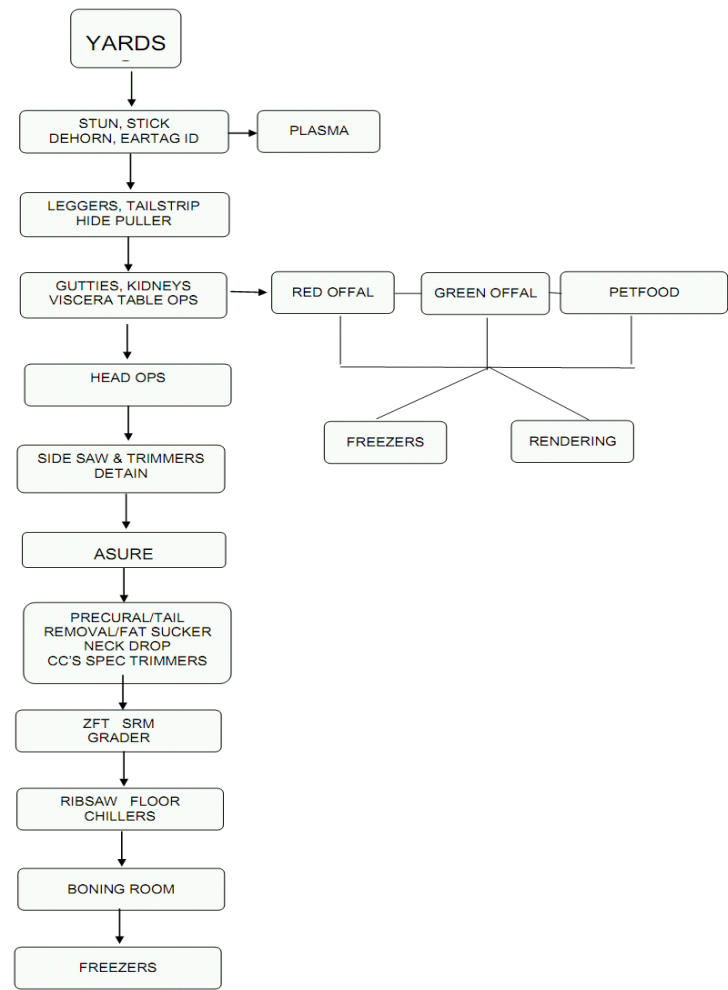

**Work Position at the Meat Plant (Deer)**

| Location                      | Process Steps                                                                | Tick if part of work | Percentage of work time |
|-------------------------------|------------------------------------------------------------------------------|----------------------|-------------------------|
| <b>Yards</b>                  | Receive and pen                                                              |                      |                         |
|                               | Ante-mortem inspection                                                       |                      |                         |
|                               | Wash                                                                         |                      |                         |
|                               | Stun                                                                         |                      |                         |
| <b>Slaughter Floor</b>        | Shackle                                                                      |                      |                         |
|                               | Stimulate                                                                    |                      |                         |
|                               | Stick                                                                        |                      |                         |
|                               | Remove front leg sinew and velvet stubs in season                            |                      |                         |
|                               | Apply clip to weasand & rod                                                  |                      |                         |
|                               | Head work-up                                                                 |                      |                         |
|                               | Y Cut                                                                        |                      |                         |
|                               | Belly rip-down, udder, pizzle                                                |                      |                         |
|                               | Clear anus, tail off                                                         |                      |                         |
|                               | Tendon and hock removal                                                      |                      |                         |
|                               | Remove hide (re-invert to rail) and remove head                              |                      |                         |
|                               | Evisceration stand: Ring, open belly, eviscerate, trim, popping kidneys      |                      |                         |
|                               | Post Mortem Inspection—Inspect head, offal, carcass/retain and re-inspection |                      |                         |
|                               | Carcass dressing check                                                       |                      |                         |
|                               | Grading                                                                      |                      |                         |
|                               | Load carcass to chiller                                                      |                      |                         |
| <b>Carcass Chillers</b>       | Chill carcass                                                                |                      |                         |
| <b>Boning/Cutting Room</b>    |                                                                              |                      |                         |
| <b>Special purposes offal</b> | Liver, heart, kidney                                                         |                      |                         |
| <b>Special purposes Asia</b>  | Pizzle, tail, sinew, tongue                                                  |                      |                         |
| <b>Special purposes blood</b> |                                                                              |                      |                         |
| <b>Offal Room</b>             |                                                                              |                      |                         |
| <b>Freezers</b>               |                                                                              |                      |                         |
| <b>Pet Food</b>               |                                                                              |                      |                         |
| <b>Office</b>                 |                                                                              |                      |                         |
| <b>Other</b>                  |                                                                              |                      |                         |

In your daily routine, how often are you using the following protective clothing (PPE) in each work position?

**Face mask with visor down:**

Position 1: \_\_\_\_\_  
 always    often    sometimes    never

Position 2: \_\_\_\_\_  
 always    often    sometimes    never

Position 3: \_\_\_\_\_  
 always    often    sometimes    never

**Goggles/glasses:**

|                                                                                                                    |                                                                                                                                                                                                                                                                                                                                                                                                                       |
|--------------------------------------------------------------------------------------------------------------------|-----------------------------------------------------------------------------------------------------------------------------------------------------------------------------------------------------------------------------------------------------------------------------------------------------------------------------------------------------------------------------------------------------------------------|
|                                                                                                                    | Position 1: _____<br>always    often    sometimes    never<br>Position 2: _____<br>always    often    sometimes    never<br>Position 3: _____<br>always    often    sometimes    never<br><br><b>Balaclava (over face):</b><br>Position 1: _____<br>always    often    sometimes    never<br>Position 2: _____<br>always    often    sometimes    never<br>Position 3: _____<br>always    often    sometimes    never |
| Work position/<br>Job title, continue from<br>last page                                                            | <b>Gloves (any sort):</b><br>Position 1: _____ both hands    one hand<br>always    often    sometimes    never<br>Position 2: _____ both hands    one hand<br>always    often    sometimes    never<br>Position 3: _____ both hands    one hand<br>always    often    sometimes    never                                                                                                                              |
| Do you believe<br>Personal Protective<br>Equipment (PPE) will<br>protect you from<br>contracting<br>Leptospirosis? | No    Yes    Don't know<br>Don't wear any                                                                                                                                                                                                                                                                                                                                                                             |
| Do you find wearing<br>PPE inconvenient?                                                                           | No                      Yes<br>Don't wear any                                                                                                                                                                                                                                                                                                                                                                         |
| Do you smoke at work<br>breaks?                                                                                    | No                      Yes                                                                                                                                                                                                                                                                                                                                                                                           |

**Abattoir Work History:**

|                                                            |                             |
|------------------------------------------------------------|-----------------------------|
| For how long have you been working in an abattoir (years)? |                             |
| Have you been working mainly in the meat industry?         | Yes                      No |

*We Want to Quantify Work Place Exposure for the Last 3 Years*

| Year                                                    | Plant location/<br>name | How many<br>months<br>worked | Full time? | Species exposure<br>(sheep = S, beef =<br>B, bobbies = BC,<br>deer = D) | Positions/<br>Job titles |
|---------------------------------------------------------|-------------------------|------------------------------|------------|-------------------------------------------------------------------------|--------------------------|
| 2009/10<br>(last season)                                |                         |                              | Yes    No  |                                                                         |                          |
| 2008/9<br>(season before that)                          |                         |                              | Yes    No  |                                                                         |                          |
| 2007/8                                                  |                         |                              | Yes    No  |                                                                         |                          |
| Have you worked for an abattoir or butcher before 2007? |                         |                              | Yes    No  |                                                                         |                          |
| If yes, since when?                                     |                         |                              |            |                                                                         |                          |
| If yes, to which animal species were you exposed to?    |                         |                              |            |                                                                         |                          |

*Other Regular Work History—Not Abattoir*

Over the last 3 years, have you had any other regular work besides your work in an abattoir?

NO      Skip to non-work exposures 3.1

YES      Complete table below

| Type of work                          | How many hours per<br>week?                                   | Approximately for how long have<br>you done this (years)? | When did you last do this work? |
|---------------------------------------|---------------------------------------------------------------|-----------------------------------------------------------|---------------------------------|
| Forestry                              |                                                               |                                                           |                                 |
| Livestock/<br>Farming                 |                                                               |                                                           |                                 |
| Species                               | Beef cattle    Dairy cattle    Sheep    Goats    Deer    Pigs |                                                           |                                 |
| Horticulture/<br>cropping/<br>orchard |                                                               |                                                           |                                 |
| Other                                 |                                                               |                                                           |                                 |

## Non-work Exposures

### Regular contact with live animals at home, friend's or family's house

Over the last 3 years, have you had regular (daily or weekly) contact with animals outside work?

NO Skip to **Wildlife Table 3.2**

YES Complete table below

| Animal type  | No of animals | Animals vaccinated against Leptospirosis? |            |     |
|--------------|---------------|-------------------------------------------|------------|-----|
| Beef cattle  |               | No                                        | Don't know | Yes |
| Dairy cattle |               | No                                        | Don't know | Yes |
| Sheep        |               | No                                        | Don't know | Yes |
| Goats        |               | No                                        | Don't know | Yes |
| Deer         |               | No                                        | Don't know | Yes |
| Pigs         |               | No                                        | Don't know | Yes |
| Dogs         |               | No                                        | Don't know | Yes |
| Cats         |               | No                                        | Don't know | Yes |
| Other        |               | No                                        | Don't know | Yes |

## Wildlife

|                                                                                                                                      |     |    |            |
|--------------------------------------------------------------------------------------------------------------------------------------|-----|----|------------|
| Over the last 3 years, have you often * seen rats, mice, possums, rabbits or hedge hogs at home (house, garden, surrounding fields)? | Yes | No | Don't know |
| Do you set traps or poison for these animals at home?                                                                                | Yes | No | Don't know |

Note: \* often: more than or once a week.

## Home slaughter

Did you home slaughter or have you helped with home slaughtering any animals in the past 3 years?

NO Skip to **Hunting/Trapping Table 3.4**

YES Complete table below

| Animal type | How many per year? | How often per year? | When was the last time? |
|-------------|--------------------|---------------------|-------------------------|
| Cattle      |                    |                     |                         |
| Sheep       |                    |                     |                         |
| Goats       |                    |                     |                         |
| Deer        |                    |                     |                         |
| Pigs        |                    |                     |                         |

**Hunting/Trapping exposures**

Have you been hunting in the last 3 years?

NO Skip to **Other Outdoors Table 3.5.**

YES Complete table below

| Animals hunted | For how long have you been doing it (years)? | How many shot or trapped in an average year? | When shot or trapped an animal last time? |
|----------------|----------------------------------------------|----------------------------------------------|-------------------------------------------|
| Deer           |                                              |                                              |                                           |
| Wild pig       |                                              |                                              |                                           |
| Small game *   |                                              |                                              |                                           |
| Goats          |                                              |                                              |                                           |
| Other          |                                              |                                              |                                           |

Note: \* e.g., ducks, other birds, possums, rabbits, hares...

**Other Outdoor exposures**

Over the last 3 years, have you done outdoor activities where you were exposed to fresh water?

NO Skip to **Flooding 3.6**

YES Complete table below

| Outdoor activities <i>fresh water</i>                                                    | For how long have you been doing it (years)? | How often per year? | When was the last time? | Region? |
|------------------------------------------------------------------------------------------|----------------------------------------------|---------------------|-------------------------|---------|
| Camping beside lakes/rivers                                                              |                                              |                     |                         |         |
| Water sports in lakes/rivers<br>e.g. swimming, boating,<br>windsurfing, endurance events |                                              |                     |                         |         |
| Fresh water fishing                                                                      |                                              |                     |                         |         |
| Did you do any of these activities overseas?                                             | No Yes If yes, specify country(ies) _____    |                     |                         |         |

**Flooding**

Over the last 3 years has your land been flooded (for several days leaving a water puddle (at least 5m by 10m, 10 cm deep)?

NO Skip to **Previous Illness 4.**

YES When the last time? \_\_\_\_\_

**Previous illness**

Have you ever been diagnosed with Leptospirosis?

YES Complete **Lepto Table 4.1**

NO Don't know Skip to **Other illness Table 4.2**

**Leptospirosis**

|                                                   |                      |                        |                     |
|---------------------------------------------------|----------------------|------------------------|---------------------|
| Approximate date:                                 | _____                |                        |                     |
| How was it diagnosed (test)?                      | Self diagnosed       | GP                     | Blood test          |
| Do you know the serovar and/or titre?             | Serovar: _____       | Titre: _____           | No                  |
| How many days were you off-work or seriously ill? | _____ days           |                        |                     |
| Please describe the symptoms? *                   |                      |                        |                     |
| Was it treated?                                   | Yes                  | No                     | Don't know/remember |
|                                                   | Antibiotic treatment | If yes, how many days: |                     |
| Received ACC compensation?                        | Yes                  | No                     | Don't know/remember |

Note: \* e.g., fever, headache, sore muscles or bones, sore eyes, sweating, severe general debility.

**Other Illness**

|                                                                                 |                          |                        |                     |
|---------------------------------------------------------------------------------|--------------------------|------------------------|---------------------|
| Have you had any flu-like symptoms in the last 3 years ( <i>excl. injury</i> )? | Yes                      | No                     | Approx date _____   |
| Have you been off work due to this illness?                                     | # days _____             | No                     |                     |
| Did you ask for professional help?                                              | GP                       | Nurse                  | Other _____ No      |
| Were any blood tests done or samples collected?                                 | Yes                      | No                     | NA                  |
| Was a diagnosis made?                                                           | Yes , diagnosis of _____ | No                     | Do not remember     |
| Did you have any of the following symptoms?                                     | Fever                    | Headache               | Sore muscles        |
|                                                                                 | Sore eyes                | Sweating               | Severe debility     |
| Was it treated?                                                                 | Yes                      | No                     | Don't know/remember |
|                                                                                 | Antibiotic treatment     | If yes, how many days: |                     |

This is the end of the questionnaire. The research team appreciates your involvement in this study of leptospirosis and is committed to privacy of all personal information.

The lab will check your blood for previous exposure for Lepto and we will notify you of the result by mail as soon as possible.”
